# Supplementary material for: Advanced three-dimensional X-ray imaging unravels structural development of the human thymus compartments
Source: PubMed Central journal article supplement (PMC11496816; doi:10.1038/s43856-024-00623-7), 2024-10-22
Supplement: 43856_2024_623_MOESM3_ESM.pdf [file 43856_2024_623_MOESM3_ESM.pdf]

## Description of Additional Supplementary Files

**File name:** Supplementary Data 1

**File description:** Data for graphs presented in Fig 4

**File name:** Supplementary Data 2

**File description:** Data for graph presented in Fig 5
